# Supplementary material for: Bromide–acetate co-mediated high-power density rechargeable aqueous zinc–manganese dioxide batteries
Source: Royal Society of Chemistry journal article supplement (doi:10.1039/d1ta05716b), 2021-01-01
Supplement: d1ta05716b1.pdf [file d1ta05716b1.pdf]

## Electronic Supplementary Information

### **Bromide-acetate co-mediated high power density rechargeable aqueous zinc- manganese dioxide batteries**

*Jing Wu<sup>a,b</sup>, Yining Li<sup>a,b</sup>, Jiaqi Huang<sup>a,b</sup>, Xiaowei Chi<sup>a\*</sup>, Jianhua Yang<sup>a,b</sup>, Yu Liu<sup>a\*</sup>*

Jing Wu, Yining Li, Prof. Xiaowei Chi, Prof. Jianhua Yang, Prof. Yu Liu

<sup>a</sup>Shanghai Institute of Ceramics, Chinese Academy of Sciences

Shanghai 200050, China

Email: xwchi@mail.sic.ac.cn

Email: yuliu@mail.sic.ac.cn

Jing Wu

<sup>b</sup>University of Chinese Academy of Sciences

Beijing 100049, China

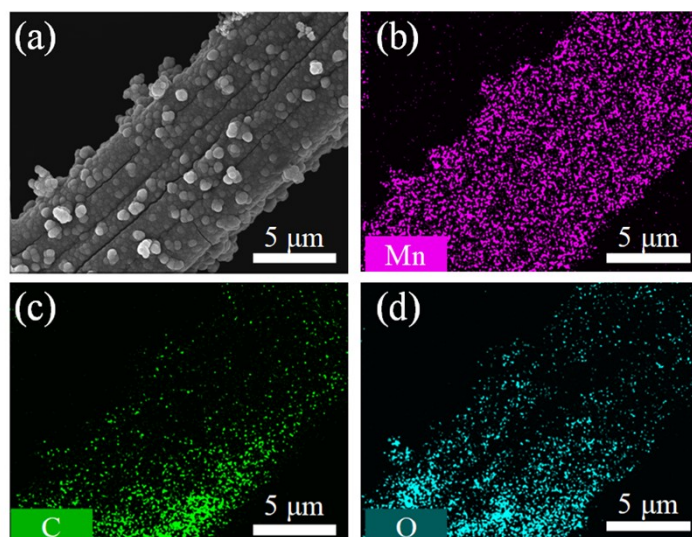

Figure S1. Elemental mapping distribution images of the electrodeposited  $\text{MnO}_2$  on the carbon fibers substrate.

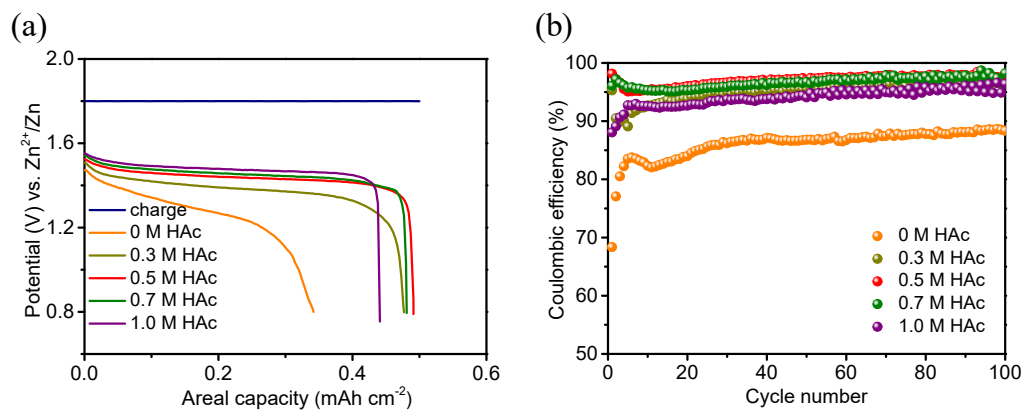

Figure S2. (a) Charge and discharge profiles and (b) cycling performance of acetate-based electrolyte with different concentrations of acetic acid (HAc) buffering agent at limited charge capacity of  $0.5 \text{ mAh cm}^{-2}$  and discharge current density of  $1 \text{ mA cm}^{-2}$ .

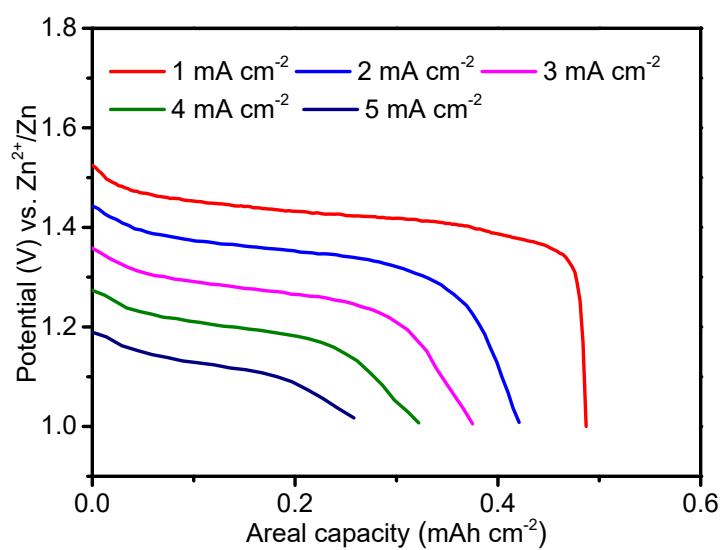

Figure S3. The discharge profiles of the Zn-MnO<sub>2</sub> battery at different discharge current densities from 1 to 5 mA cm<sup>-2</sup> in the KBr-free electrolyte.

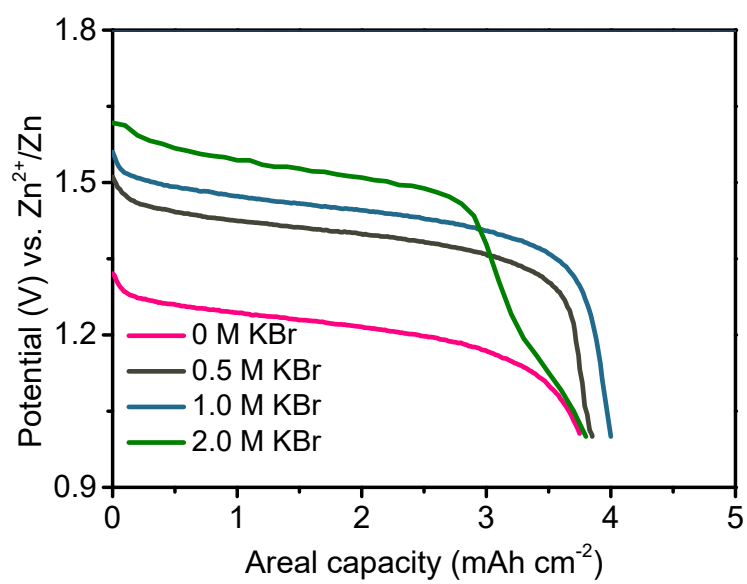

Figure S4. Discharge profiles of the Zn-MnO<sub>2</sub> batteries with different concentrations of KBr additives in the electrolytes with a discharge current density of 5 mA cm<sup>-2</sup>.

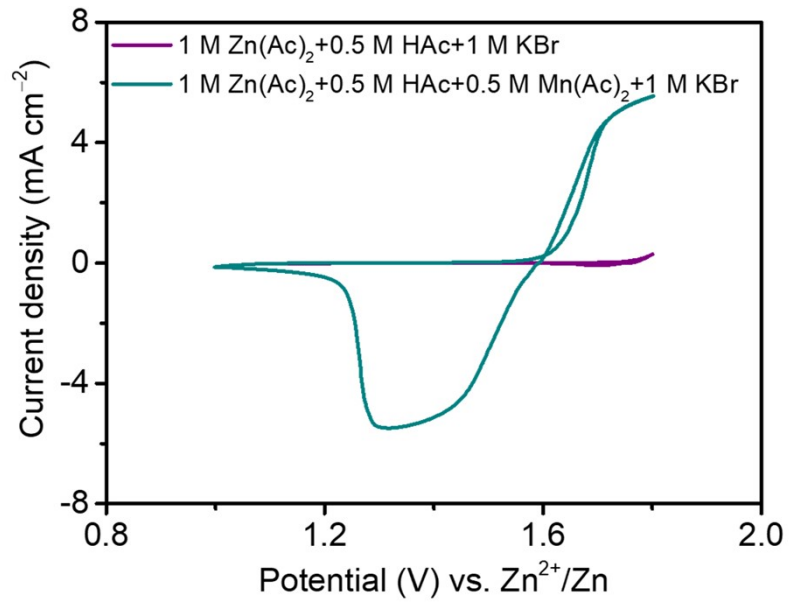

Figure S5. CV curves of cells with different electrolytes (1 M Zn(Ac)<sub>2</sub>+0.5 M HAc +1M KBr and 1 M Zn(Ac)<sub>2</sub>+0.5 M HAc+1 M KBr+0.5 M Mn(Ac)<sub>2</sub>) at a scan rate of 0.5 mV s<sup>-1</sup>.

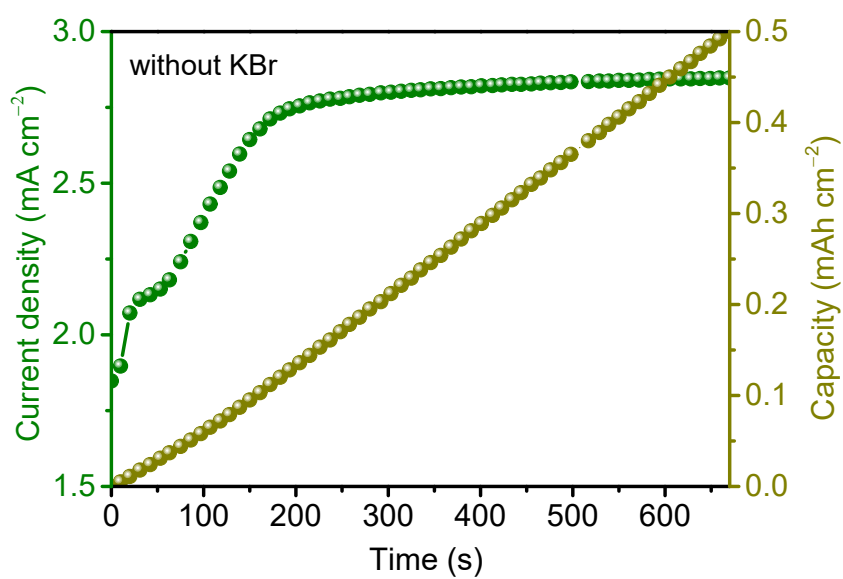

Figure S6. Charging behavior of the Zn-MnO<sub>2</sub> batteries with KBr-free additive electrolyte.

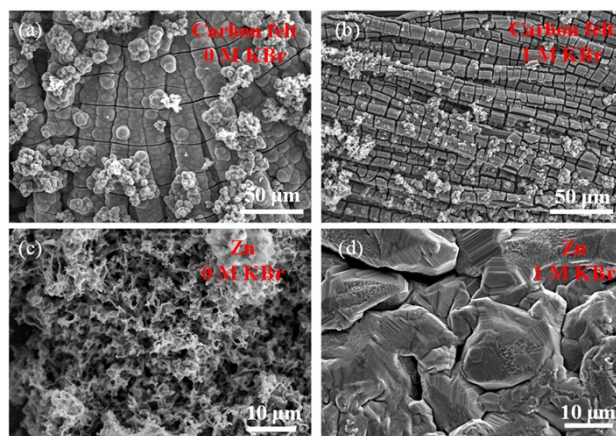

Figure S7. SEM images of carbon felt (a-b) and Zn electrodes (c-d) after charged at 1.8 V to an areal capacity of  $10 \text{ mAh cm}^{-2}$  in the electrolytes with and without 1.0 M KBr additive.



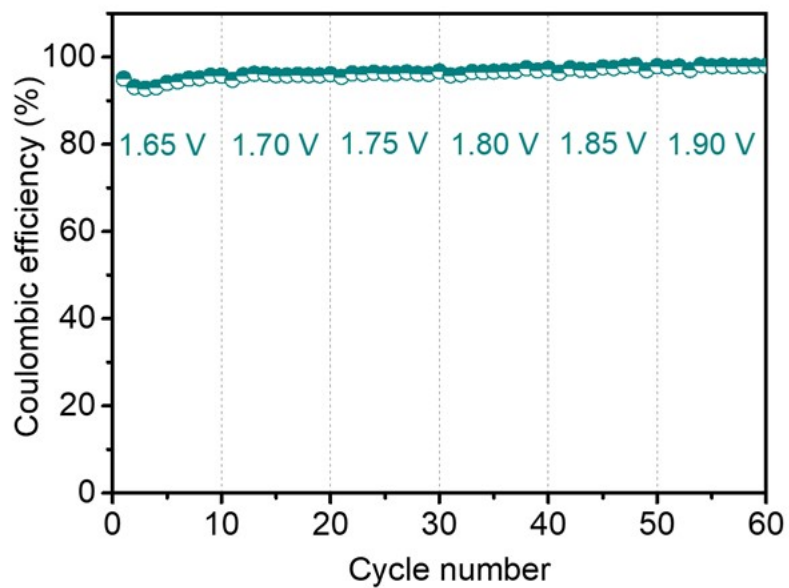

Figure S8. The cycling performance of the Zn-MnO<sub>2</sub> cell with 1 M KBr additive under different charging voltages from 1.65–1.90 V with a constant charging capacity of 1 mAh cm<sup>-2</sup> and discharge current density of 5 mA cm<sup>-2</sup>.

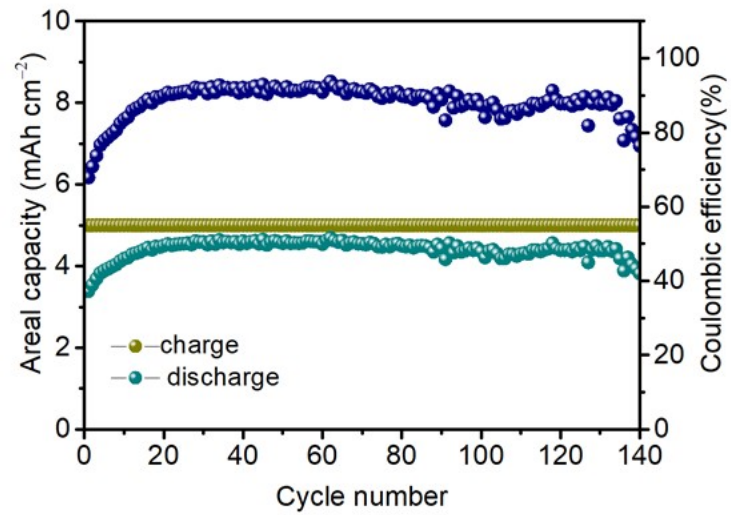

Figure S9. Cycling performance of the Zn-MnO<sub>2</sub> cell with 1 M KBr additive with a charging capacity of 5 mAh cm<sup>-2</sup> and a discharge current density of 5 mA cm<sup>-2</sup>.

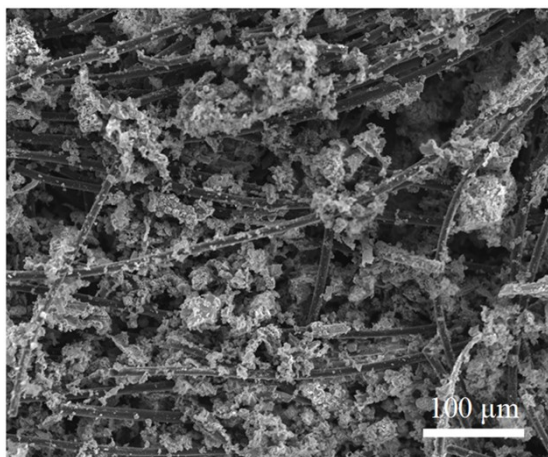

Figure S10. SEM image of carbon felt substrate after 1000 cycles in the electrolyte without KBr additive with a deposited capacity of  $0.5 \text{ mAh cm}^{-2}$  and a discharge current density of  $5 \text{ mA cm}^{-2}$ .

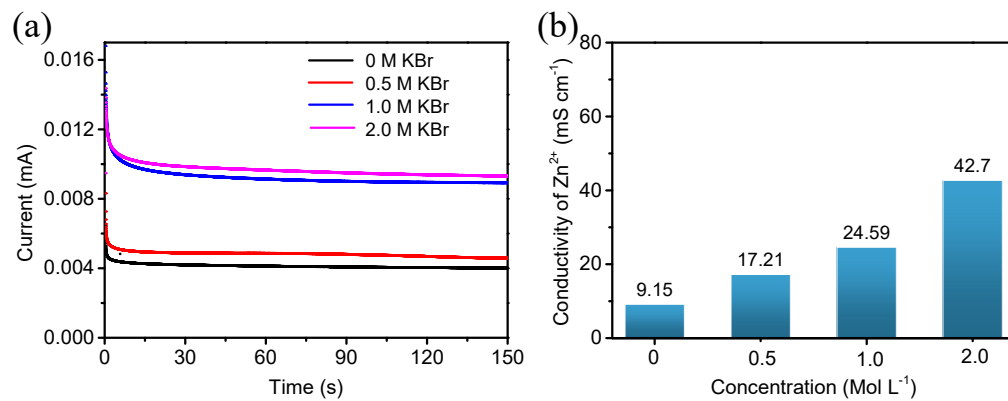

Figure S11. (a) Chronoamperometry curves of Zn symmetric cell and (b) Conductivity of Zn<sup>2+</sup> in the electrolytes with different concentrations of KBr additive.

Table S1. The electrolyte structural feature and the binding energy of the  $Zn^{2+}$  and  $Mn^{2+}$  cations within different solvation sheaths ( $H_2O$ ,  $Ac^-$  and  $Br^-$ ).

| Cations and ligands  | Optimized structure                                                                 | Binding energy (eV) | Cations and ligands  | Optimized structure                                                                   | Binding energy (eV) |
|----------------------|-------------------------------------------------------------------------------------|---------------------|----------------------|---------------------------------------------------------------------------------------|---------------------|
| Zn+H <sub>2</sub> O  |    | -4.8                | Mn+H <sub>2</sub> O  |    | -3.8                |
| Zn+2H <sub>2</sub> O |    | -8.8                | Mn+2H <sub>2</sub> O |    | -6.9                |
| Zn+3H <sub>2</sub> O |    | -10.8               | Mn+3H <sub>2</sub> O |    | -8.6                |
| Zn+4H <sub>2</sub> O |    | -12.1               | Mn+4H <sub>2</sub> O |    | -9.3                |
| Zn+5H <sub>2</sub> O |   | -13.0               | Mn+5H <sub>2</sub> O |   | -10.0               |
| Zn+6H <sub>2</sub> O |  | -13.4               | Mn+6H <sub>2</sub> O |  | -9.9                |
| Zn+Ac <sup>-</sup>   |  | -10.7               | Mn+Ac <sup>-</sup>   |  | -8.3                |
| Zn+2Ac <sup>-</sup>  |  | -15.8               | Mn+2Ac <sup>-</sup>  |  | -13.4               |
| Zn+Br <sup>-</sup>   |  | -10.3               | Mn+Br <sup>-</sup>   |  | -8.4                |
| Zn+2Br <sup>-</sup>  |  | -15.6               | Mn+2Br <sup>-</sup>  |  | -12.7               |
| Zn+3Br <sup>-</sup>  |  | -17.0               | Mn+3Br <sup>-</sup>  |  | -14.4               |
| Zn+4Br <sup>-</sup>  |  | -16.1               | Mn+4Br <sup>-</sup>  |  | -13.7               |
